# Supplementary material for: An Improved Chromosome-Level Genome Assembly of the Firefly Pyrocoelia pectoralis
Source: MDPI journal article supplement (doi:10.3390/insects15010043), 2024-01-08
Supplement: s1 [file s1]

## Supplementary Material

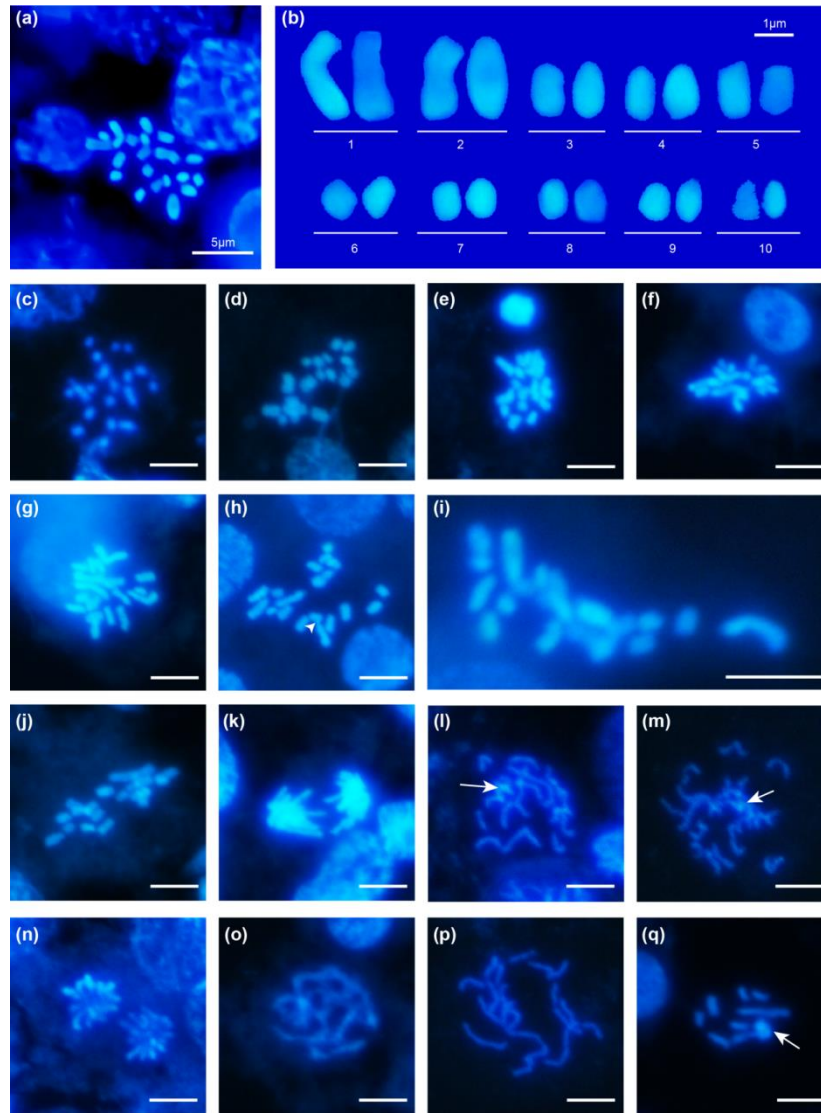

**Figure S1.** Karyotype analysis of *Pyrocoelia pectoralis*. (a) Spermatogonial metaphase stained with DAPI,  $2n=20$ , Scale bar,  $5\mu\text{m}$ . (b) Karyogram, Scale bar,  $1\mu\text{m}$ . (c-g) Mitotic metaphase of *P. pectoralis*. (h-k) the chromosomes are pulled apart and move to the opposite ends of the cell, triangle indicated possible Y chromosome, which is much smaller than X chromosome, (l-n) Meiosis I of *P. pectoralis*. Arrows indicated diffuse diplotene with the condensed sex chromosome and decondensed bivalents, (o-q) Meiosis II of *P. pectoralis*. Arrow indicated the sex chromosomes at the top very condensed. Scale bar,  $5\mu\text{m}$ .

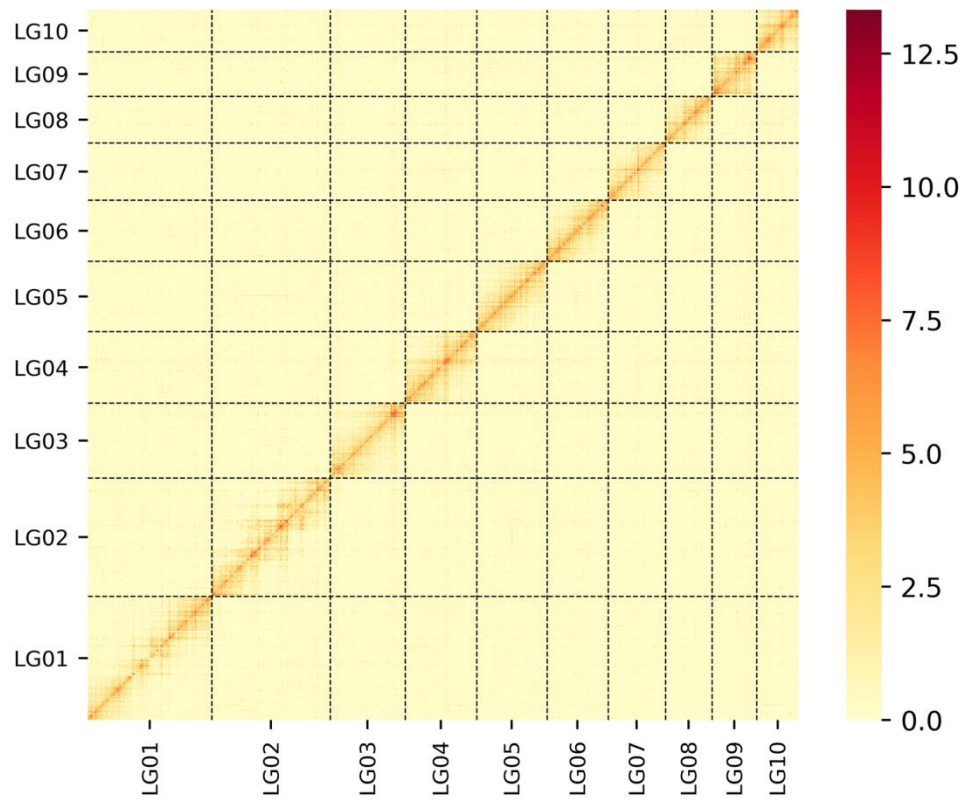

**Figure S2. Hi-C contact data mapped on the updated *P. pectoralis* Hi-C genome Ppec-2.0, showing genome-wide all-by-all interactions**

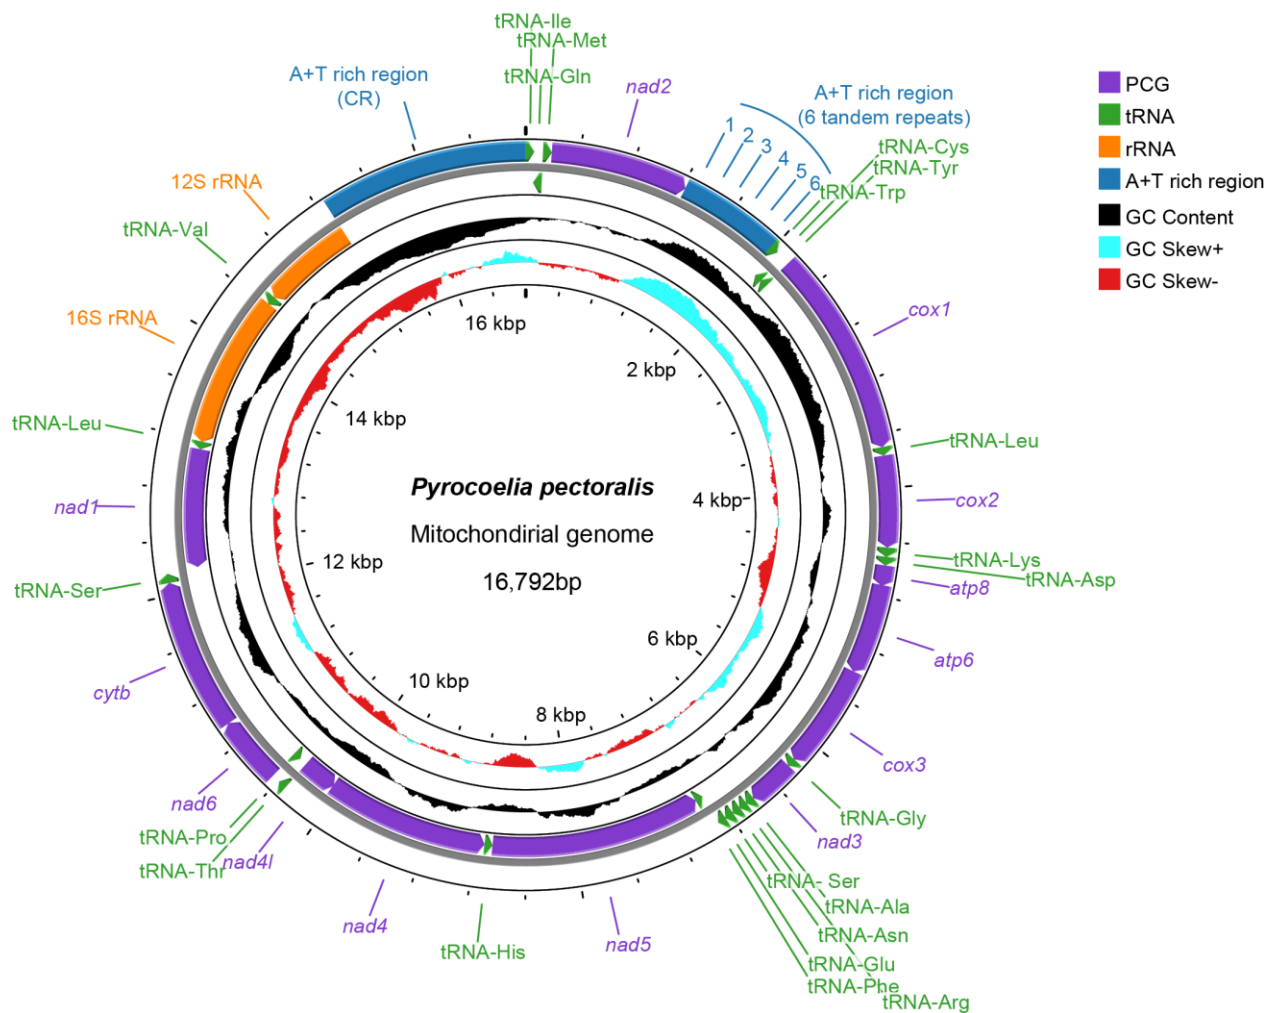

**Figure S3. Graphical map of the complete mitochondrial genome of *P. pectoralis*.** Drawn to scale as indicated by the innermost circle. The inner circle indicates the GC skew (using a red and blue sliding window, indicating its positive and negative values respectively). The middle circle indicates the GC content. The outer circle indicates gene arrangement, genes encoded by the direct strand were shown outside, and encoded by the reverse strand inside the outermost circle respectively (arrows indicate the direction of gene transcription). The statistic was based on a 500bp window.

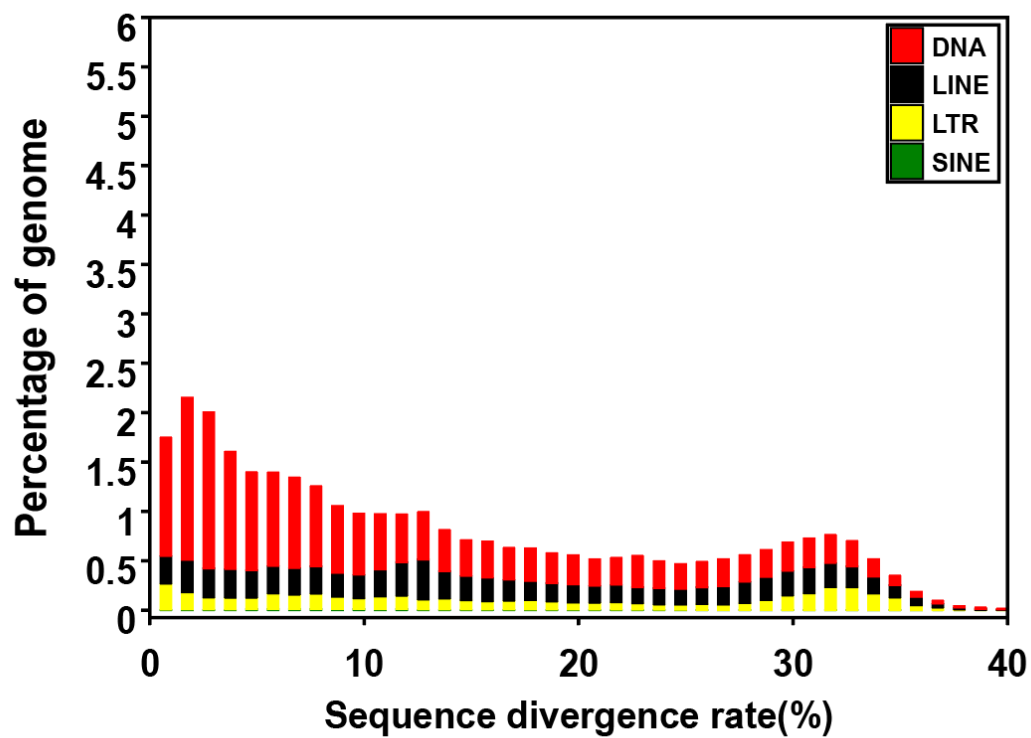

Figure S4. Distribution of divergence rate for the four types of TE in *P. pectoralis* Hi-C genome Ppec-2.0

(a)

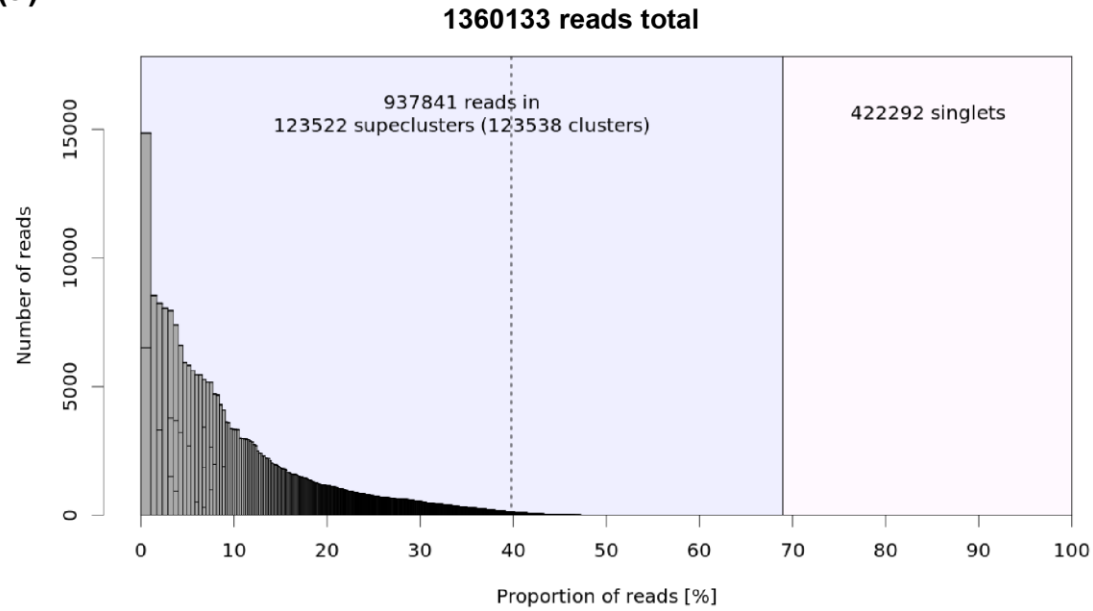

(b)

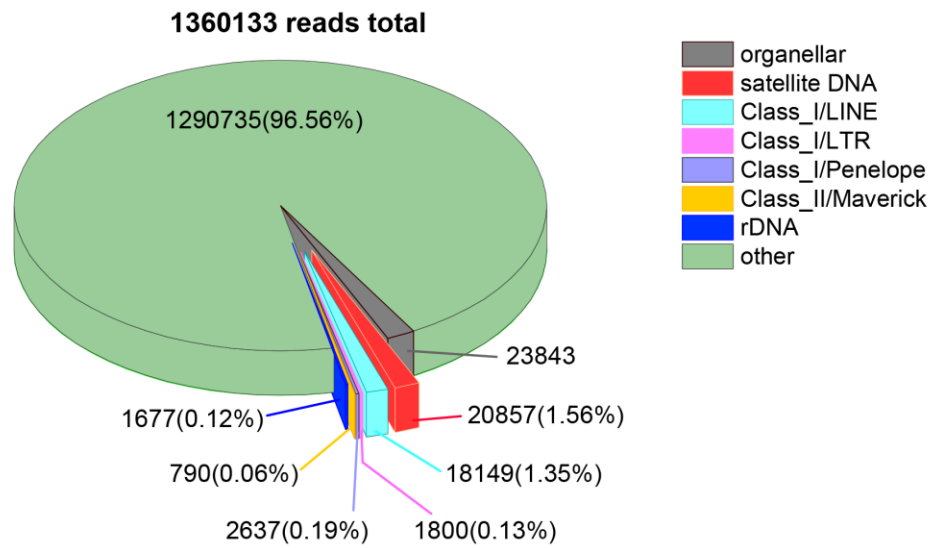

**Figure S5. De novo identification of satellite DNAs in the sequenced genomes of *P. pectoralis* using the RepeatExplorer.** (a) Graphical summary of the clustering results of *P. pectoralis* Illumina unassembled sequences. Bars represent superclusters, with their heights and widths corresponding to the numbers of reads in the superclusters (y-axis) and to their proportions in all analyzed reads (x-axis), respectively. Rectangles inside the supercluster bars represent individual clusters. If the filtering of abundant satellites was performed, the affected clusters are shown in green, and their sizes correspond to the adjusted values. Blue and pink background panels show proportions of reads that were clustered and remained single, respectively. Top clusters are on the left of the dotted line. (b) Repeat annotation summary the automatic annotations of clusters.

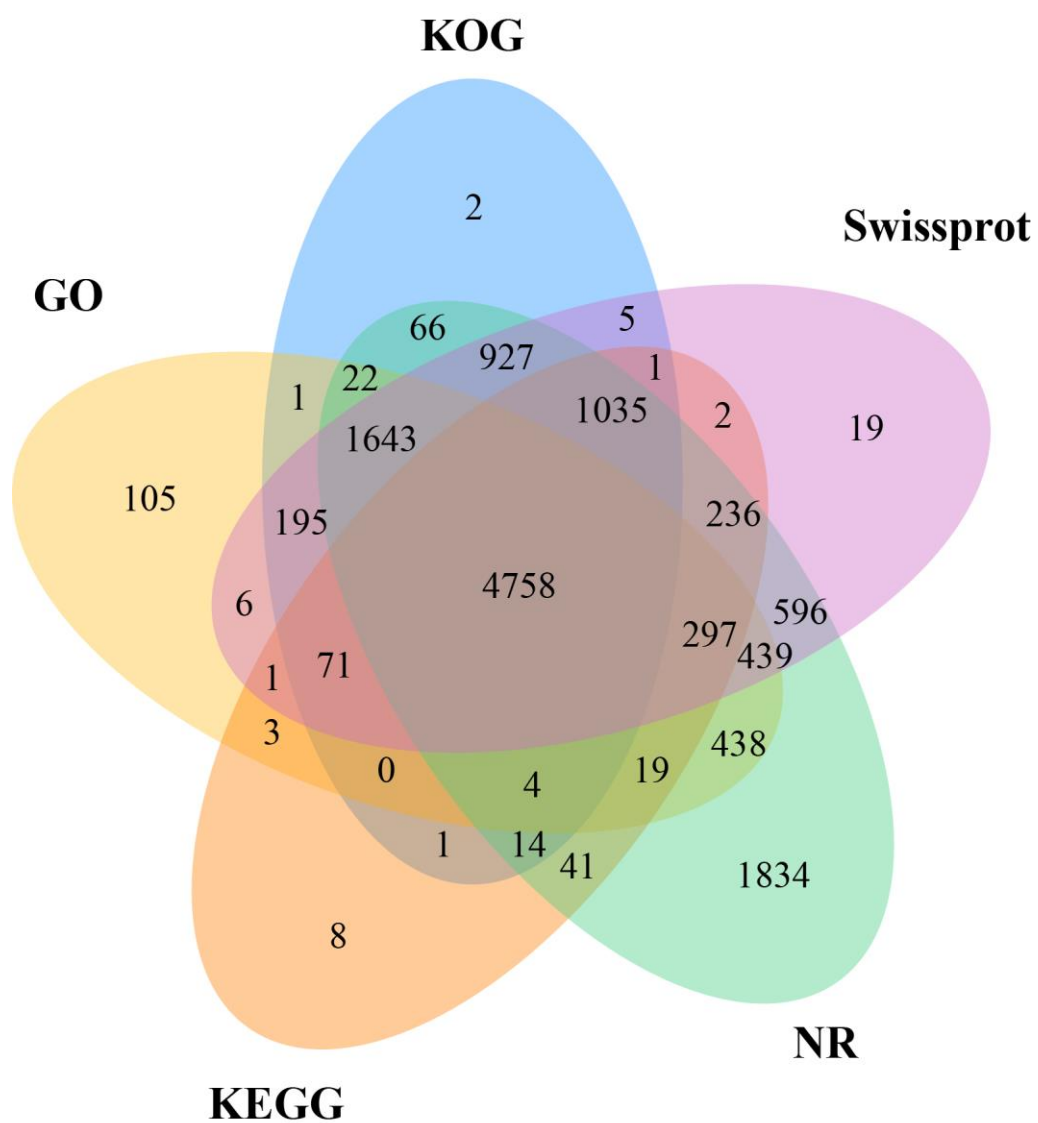

Figure S6. Venn diagram of gene function annotation by Swissprot, KEGG, GO, NR and KOG

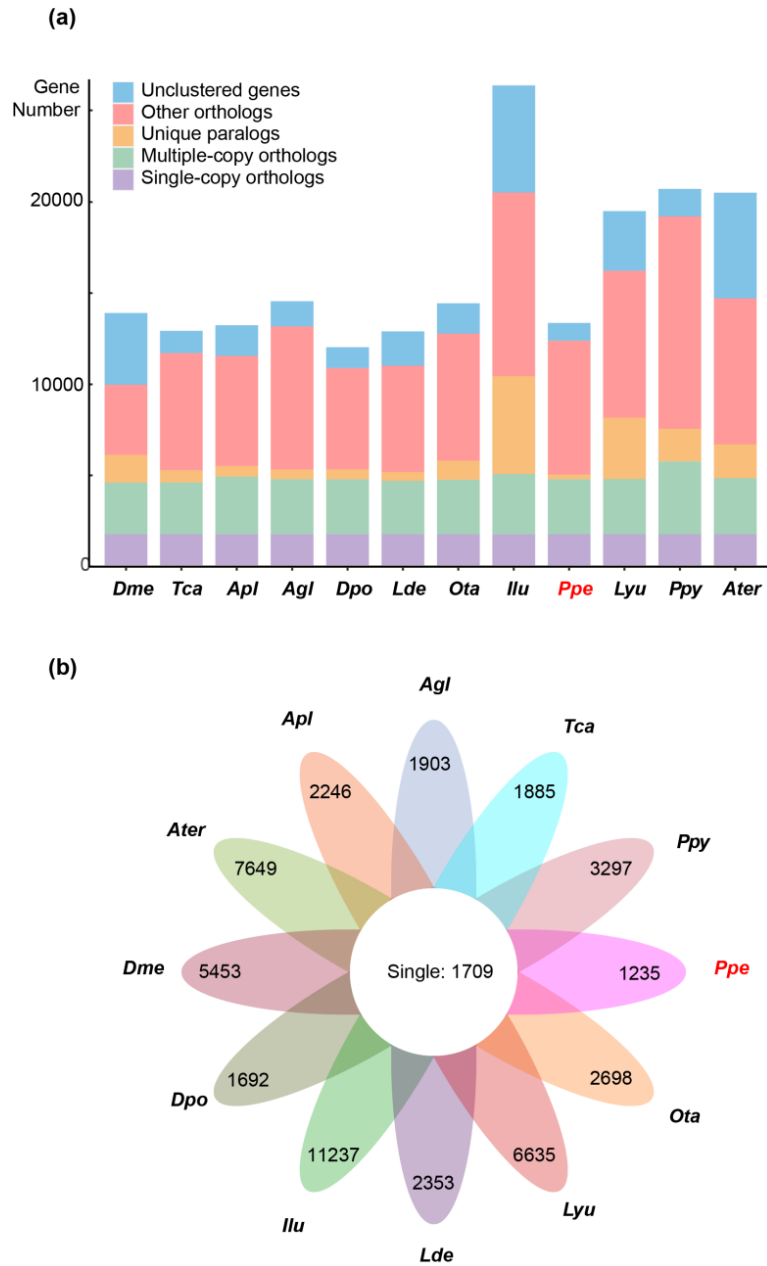

**Figure S7. Orthogroup (OGs) clustering analysis of peptides in 12 insects.** (a) the multiple-copy orthologs are orthologs that have multiple copies in one species, the single-copy orthologs are orthologs that have only a single copy in one species, the other orthologs are the remainders of the orthologs; the unclustered genes are genes that have no homology with others, and the unique paralogs are genes that only exist in one specific species. Dme, *Drosophila melanogaster*; Tca, *Tribolium castaneum*; Apl, *Agrilus planipennis*; Agl, *Anoplophora glabripennis*; Dpo, *Dendroctonus ponderosae*; Lde, *Leptinotarsa decemlineata*; Ota, *Onthophagus taurus*; Ilu, *Ignelater luminosus*; Ppe, *Pyrocoelia pectoralis*; Lyu, *Lamprigera yunnana*; Ppy, *Photinus pyralis*; Ate, *Abscondita terminalis*; (b) Flower plot of gene clusters for 12 genomes. Single refers to universal single-copy genes; the petals showing numbers of species-specific orthologous genes in each species.



**Table S1. Table summary of assembly using PacBio data [12] and Hi-C data for *P. pectoralis***

| Stat Type   | Original de novo genome [12]* |                   | original genome Ppec-1.0 [12]** |                    | Hi-C genome Ppec-2.0*** |                    |
|-------------|-------------------------------|-------------------|---------------------------------|--------------------|-------------------------|--------------------|
|             | Contig. Length<br>(bp)        | Contig.<br>Number | Scaffold Length<br>(bp)         | Scaffold<br>Number | Scaffold Length<br>(bp) | Scaffold<br>Number |
| N50         | 2,316,748                     | 136               | 3,035,809                       | 79                 | 52,870,853              | 4                  |
| N60         | 1,749,500                     | 193               | 2,521,720                       | 106                | 52,416,343              | 5                  |
| N70         | 1,199,028                     | 271               | 1,842,775                       | 143                | 45,666,288              | 6                  |
| N80         | 714,909                       | 394               | 1,377,538                       | 190                | 33,942,204              | 8                  |
| N90         | 161,781                       | 689               | 813,338                         | 261                | 31,604,859              | 9                  |
| Longest     | 13,688,299                    | 1                 | 13,688,299                      | 1                  | 90,690,252              | 1                  |
| Total       | 1,119,821,639                 | 3,517             | 760,416,098                     | 474                | 532,250,877             | 363                |
| Length>=1kb | 1,119,806,285                 | 3,493             | 760,416,098                     | 474                | 532,242,980             | 350                |
| Length>=2kb | 1,119,729,364                 | 3,444             | 760,323,807                     | 464                | 532,229,674             | 341                |
| Length>=5kb | 1,119,165,291                 | 3,283             | 759,623,670                     | 444                | 532,102,132             | 305                |

\*The Original de novo genome is the primary assembly genome by de novo assembly of PacBio long reads;

\*\*The original genome Ppec-1.0 is the filtered assembly genome by PacBio and Illumina HiSeq X Ten platforms selectively remove alternative heterozygous contigs;

\*\*\*The Hi-C genome Ppec-2.0 is the improve genome assembly by Hi-C technology.

**Table S2. Table summary of original genome Ppec-1.0 contig sequences alignment information of *P. pectoralis***

| Type                          | Contig Number | Contig Number ratio(%) | Contig Length(bp) | Contig Length ratio(%) |
|-------------------------------|---------------|------------------------|-------------------|------------------------|
| Bacteria                      | 2,413         | 85.54                  | 113,250,053       | 17.53                  |
| Metazoa                       | 147           | 5.21                   | 526,185,213       | 81.45                  |
| Mitochondrion<br>/Chloroplast | 40            | 1.42                   | 411,688           | 0.06                   |
| Viruses                       | 4             | 0.14                   | 76,143            | 0.01                   |
| Fungi                         | 1             | 0.04                   | 12,945            | 0.00                   |
| Nohit                         | 216           | 7.66                   | 6,065,664         | 0.94                   |
| Total                         | 2,821         | 100.00                 | 646,001,706       | 100.00                 |

**Table S3. Evaluation on the completeness of *P. pectoralis* genome assembly and proteins for the predicted genes by BUSCO 5.1.3**

| Type                                           | original genome<br>Ppec-1.0 [12] |         | original genome<br>Ppec-1.0 predicted<br>proteins[12] |         | Hi-C genome<br>Ppec-2.0 |         | Hi-C genome<br>Ppec-2.0 predicted<br>proteins |         |
|------------------------------------------------|----------------------------------|---------|-------------------------------------------------------|---------|-------------------------|---------|-----------------------------------------------|---------|
|                                                | Number                           | Percent | Number                                                | Percent | Number                  | Percent | Number                                        | Percent |
| Complete BUSCOs (C)                            | 1355                             | 99.1%   | 1302                                                  | 95.2%   | 1295                    | 94.7%   | 1241                                          | 90.8%   |
| Complete and single-copy BUSCOs (S)            | 831                              | 60.8%   | 819                                                   | 59.9%   | 1259                    | 92.1%   | 1203                                          | 88.0%   |
| Complete and duplicated BUSCOs (D)             | 524                              | 38.3%   | 483                                                   | 35.3%   | 36                      | 2.6%    | 38                                            | 2.8%    |
| Fragmented BUSCOs (F)                          | 5                                | 0.4%    | 13                                                    | 1.0%    | 8                       | 0.6%    | 12                                            | 0.9%    |
| Missing BUSCOs (M)                             | 7                                | 0.5%    | 52                                                    | 3.8%    | 64                      | 4.7%    | 114                                           | 8.3%    |
| Total BUSCO groups searched<br>(insecta_odb10) | 1367                             | 100%    | 1367                                                  | 100%    | 1367                    | 100%    | 1367                                          | 100%    |

**Table S4. Table summary of quality assessment of Hi-C data**

| Stat Type                       | Hi-C unassembled short read |
|---------------------------------|-----------------------------|
| Raw Paired-end Reads            | 594,790,586                 |
| Clean Paired-end Reads          | 577,074,474                 |
| Clean Bases(bp)                 | 83,423,173,027              |
| Clean Paired-end Reads Rate (%) | 97.02                       |
| Clean Q30 Bases Rate (%)        | 93.23                       |
| Valid Interaction Pairs         | 33,404,550                  |
| Unique Map Reads                | 74.76%                      |

**Table S5. Hi-C Chromosome assembly result**

| Chr   | Length(bp)  | Scaffold Number |
|-------|-------------|-----------------|
| LG01  | 90,683,752  | 66              |
| LG02  | 86,755,173  | 52              |
| LG03  | 55,208,106  | 32              |
| LG04  | 52,868,053  | 29              |
| LG05  | 52,414,443  | 20              |
| LG06  | 45,664,588  | 18              |
| LG07  | 41,957,738  | 24              |
| LG08  | 33,939,104  | 32              |
| LG09  | 31,600,759  | 42              |
| LG10  | 30,862,095  | 22              |
| Total | 521,953,811 | 337             |

**Table S6. Distribution of 98,800 repeat sequences in the *P. pectoralis* Hi-C genome Ppec-2.0 based on repeat type**

| Class    | Order | Super family | Number of elements | Length of sequence (bp) | Percentage of sequence (%) |
|----------|-------|--------------|--------------------|-------------------------|----------------------------|
| Class I  | LINE  | Unknown      | 261,291            | 67,737,531              | 12.73                      |
|          |       |              | 163,476            | 44,613,355              | 8.38                       |
|          |       |              | 60,601             | 14,590,546              | 2.74                       |
|          |       |              | 3,990              | 1,180,868               | 0.22                       |
|          |       |              | 15,692             | 4,276,543               | 0.8                        |
|          |       |              | 4,492              | 1,270,300               | 0.24                       |
|          |       |              | 12,541             | 5,842,032               | 1.1                        |
|          |       |              | 15,445             | 3,957,169               | 0.74                       |
|          |       |              | 5,144              | 2,901,787               | 0.55                       |
|          |       |              | 26,352             | 6,120,184               | 1.15                       |
|          |       |              | 6,726              | 1,513,233               | 0.28                       |
|          |       |              | 2,799              | 611,641                 | 0.11                       |
|          |       |              | 5,874              | 1,871,210               | 0.35                       |
|          |       |              | 3,820              | 477,842                 | 0.09                       |
|          |       |              | 82,437             | 22,054,471              | 4.14                       |
|          | LTR   | Unknown      | 53,458             | 9,648,871               | 1.81                       |
|          |       |              | 12,564             | 6,312,796               | 1.19                       |
|          |       |              | 6,982              | 2,700,543               | 0.51                       |
|          |       |              | 7,011              | 3,234,096               | 0.61                       |
|          |       |              | 2,422              | 158,165                 | 0.03                       |
|          |       |              | 15,378             | 1,069,705               | 0.2                        |
|          | SINE  | Unknown      | 15,220             | 1,062,245               | 0.2                        |
|          |       |              | 158                | 7,460                   | 0                          |
|          |       |              | 578,268            | 138,799,300             | 26.08                      |
| Class II | DNA   | Unknown      | 412,713            | 96,920,898              | 18.21                      |
|          |       |              | 275,690            | 62,284,215              | 11.7                       |
|          |       |              | 28,793             | 5,882,870               | 1.11                       |
|          |       |              | 46,561             | 12,673,692              | 2.38                       |
|          |       |              | 8,947              | 1,667,325               | 0.31                       |
|          |       |              | 3,791              | 560,519                 | 0.11                       |
|          |       |              | 3,873              | 1,945,536               | 0.37                       |
|          |       |              | 16,982             | 5,514,932               | 1.04                       |
|          |       |              | 1,670              | 585,731                 | 0.11                       |
|          |       |              | 2,189              | 782,647                 | 0.15                       |
|          |       |              |                    |                         |                            |
|          |       |              |                    |                         |                            |

|                      |               |                |                    |              |
|----------------------|---------------|----------------|--------------------|--------------|
|                      | P             | 2,411          | 820,624            | 0.15         |
|                      | Other         | 21,806         | 4,202,807          | 0.79         |
|                      | MITE          | 160,831        | 41,022,547         | 7.71         |
|                      | Unknown       | 160,831        | 41,022,547         | 7.71         |
|                      | RC            | 4,724          | 855,855            | 0.16         |
|                      | Helitron      | 4,724          | 855,855            | 0.16         |
| Total TEs            |               | 839,559        | 206,536,831        | 38.8         |
| Tandem Repeats       |               | 37,180         | 4,894,814          | 0.92         |
|                      | tandem repeat | 20,713         | 4,661,540          | 0.88         |
|                      | SSR           | 16,467         | 233,274            | 0.04         |
| Unknown              |               | 107,841        | 15,829,691         | 2.97         |
| Other                |               | 1,678          | 199,573            | 0.04         |
| Simple repeats       |               | 1,701          | 231,388            | 0.04         |
| Low complexity       |               | 41             | 5,366              | 0            |
| <b>Total Repeats</b> |               | <b>988,000</b> | <b>227,697,663</b> | <b>42.78</b> |

**Table S7. Transposable elements (TEs) content in the assembled genomes of fireflies *Lamprigera yunnana*, *Abscondita terminalis*, *Aquatica lateralis*, *Photinus pyralis* and *P. pectoralis***

| Species              | Type                | Length (bp)        | % in genome  |
|----------------------|---------------------|--------------------|--------------|
| <i>L. yunnana</i>    | DNA                 | 367,551,516        | 34.91        |
|                      | LINE                | 162,115,182        | 15.40        |
|                      | SINE                | 2,204,348          | 0.21         |
|                      | LTR                 | 1,766,904          | 0.17         |
|                      | Other               | 1,382              | 0.00         |
|                      | Unknown             | 0                  | 0            |
|                      | <b>Total repeat</b> | <b>688,292,463</b> | <b>65.37</b> |
| <i>A. terminalis</i> | DNA                 | 88,325,208         | 17.62        |
|                      | LINE                | 49,456,973         | 9.86         |
|                      | SINE                | 715,335            | 0.14         |
|                      | LTR                 | 4,638,621          | 0.93         |
|                      | Other               | 60                 | 0.00         |
|                      | Unknown             | 0                  | 0            |
|                      | <b>Total repeat</b> | <b>169,247,169</b> | <b>33.76</b> |
| <i>A. lateralis</i>  | DNA                 | 134,817,777        | 14.84        |
|                      | LINE                | 67,707,232         | 7.45         |
|                      | SINE                | 1,184,109          | 0.13         |
|                      | LTR                 | 2,704,957          | 0.29         |
|                      | Other               | 177                | 0.00         |
|                      | Unknown             | 0                  | 0            |
|                      | <b>Total repeat</b> | <b>249,489,409</b> | <b>27.46</b> |
| <i>P. pyralis</i>    | DNA                 | 118,270,813        | 25.08        |
|                      | LINE                | 40,283,641         | 8.54         |
|                      | SINE                | 1,748,154          | 0.37         |
|                      | LTR                 | 9,967,599          | 2.11         |
|                      | Other               | 0                  | 0            |
|                      | Unknown             | 9,853,553          | 2.09         |
|                      | <b>Total repeat</b> | <b>218,446,960</b> | <b>46.33</b> |
| <i>P. pectoralis</i> | DNA                 | 96,920,898         | 18.21        |
|                      | LINE                | 44,613,355         | 8.38         |
|                      | SINE                | 1,069,705          | 0.2          |
|                      | LTR                 | 22,054,471         | 4.14         |
|                      | Other               | 199,573            | 0.04         |
|                      | Unknown             | 15,829,691         | 2.97         |
|                      | <b>Total repeat</b> | <b>227,697,663</b> | <b>42.78</b> |



**Table S8. Gene comparison between *P. pectoralis* Hi-C genome Ppec-2.0 with other species**

| Gene set               | Total<br>number of<br>genes | Average<br>gene length<br>(bp) | Average CDS<br>length(bp) | Average<br>exons<br>number per<br>gene | Average<br>exon length<br>(bp) | Average<br>intron<br>length (bp) |
|------------------------|-----------------------------|--------------------------------|---------------------------|----------------------------------------|--------------------------------|----------------------------------|
| <i>P. pectoralis</i>   | 13,292                      | 14,806                         | 1481                      | 5.18                                   | 285                            | 3188                             |
| <i>L. yunnana</i>      | 19,443                      | 16,619                         | 1377                      | 4.74                                   | 290                            | 3647                             |
| <i>A. terminalis</i>   | 20,436                      | 7,767                          | 1483                      | 4.77                                   | 311                            | 1532                             |
| <i>P. pyralis</i>      | 20,646                      | 8,113                          | 1489                      | 5.15                                   | 289                            | 1595                             |
| <i>A. planipennis</i>  | 13,358                      | 11,946                         | 1541                      | 5.75                                   | 268                            | 2190                             |
| <i>A. glabripennis</i> | 14,815                      | 16,649                         | 1511                      | 5.58                                   | 271                            | 3305                             |
| <i>D. ponderosae</i>   | 13,021                      | 8,398                          | 1503                      | 6.78                                   | 221                            | 1193                             |
| <i>L. decemlineata</i> | 14,000                      | 14,162                         | 1377                      | 5.05                                   | 272                            | 3156                             |
| <i>O. taurus</i>       | 14,537                      | 7,834                          | 1523                      | 4.54                                   | 335                            | 1783                             |
| <i>T. castaneum</i>    | 12,863                      | 6,999                          | 1550                      | 5.28                                   | 293                            | 1273                             |
| <i>D.melanogaster</i>  | 13,918                      | 4,597                          | 1560                      | 3.9                                    | 400                            | 1047                             |

**Table S9. Summary of gene function annotation of the assembled Hi-C genome Ppec-2.0 of *P. pectoralis***

|            | Type      | Number | Percent (%) |
|------------|-----------|--------|-------------|
| Annotation | Swissprot | 10,231 | 76.97       |
|            | KEGG      | 6,491  | 48.83       |
|            | KOG       | 8,745  | 65.79       |
|            | GO        | 8,002  | 60.2        |
|            | NR        | 12369  | 93.06       |
| Total      | Annotated | 12,789 | 96.22       |
|            | Gene      | 13,292 | -           |

**Table S10. Annotation of non-coding RNAs in the *P. pectoralis* Hi-C genome Ppec-2.0.**

|            | Type                    | Copy<br>Number | Average<br>Length(bp) | Total<br>Length(bp) | Percentage of<br>sequence (%) |
|------------|-------------------------|----------------|-----------------------|---------------------|-------------------------------|
| rRNA       | 18S                     | 171            | 1920.46               | 328399              | 0.0617                        |
|            | 28S                     | 111            | 5425.7                | 602253              | 0.1132                        |
|            | 5.8S                    | 42             | 160.9                 | 6758                | 0.0013                        |
|            | 5S                      | 110            | 113.46                | 12481               | 0.0023                        |
| microRNA   | snRNA                   | 6              | 143.17                | 859                 | 0.0002                        |
|            | miRNA                   | 54             | 84.83                 | 4581                | 0.0009                        |
|            | spliceosomal            | 55             | 143.22                | 7877                | 0.0015                        |
|            | other                   | 418            | 285.17                | 119201              | 0.0224                        |
| Regulatory | cis-regulatory elements | 190            | 97.75                 | 18573               | 0.0035                        |
| tRNA       | tRNA                    | 2898           | 75.24                 | 218057              | 0.041                         |

**Table S11. Summary of gene families in 12 species**

| Order             | Family                            | Species                     | Total genes  | Single      | Multi        | Unique     | Other       | Unclassified | Family number | Unique Families number |
|-------------------|-----------------------------------|-----------------------------|--------------|-------------|--------------|------------|-------------|--------------|---------------|------------------------|
| Diptera           | Drosophilidae                     | <i>D. melanogaster</i>      | 13842        | 1709        | 2,829        | 1,523      | 3851        | 3,930        | 7,513         | 433                    |
| Coleoptera        | Tenebrionidae                     | <i>T. castaneum</i>         | 12863        | 1709        | 2,848        | 670        | 6421        | 1,215        | 9,532         | 200                    |
| Coleoptera        | Buprestidae                       | <i>A. planipennis</i>       | 13166        | 1709        | 3,167        | 573        | 6044        | 1,673        | 8,961         | 187                    |
| Coleoptera        | Cerambycidae                      | <i>A. glabripennis</i>      | 14487        | 1709        | 3,018        | 527        | 7857        | 1,376        | 9,887         | 172                    |
| Coleoptera        | Curculionidae                     | <i>D. ponderosae</i>        | 11968        | 1709        | 3,015        | 556        | 5552        | 1,136        | 8,792         | 215                    |
| Coleoptera        | Chrysomelidae                     | <i>L. decemlineata</i>      | 12829        | 1709        | 2,933        | 483        | 5834        | 1,870        | 9,049         | 174                    |
| Coleoptera        | Scarabaeidae                      | <i>O. taurus</i>            | 14374        | 1709        | 2,997        | 1,039      | 6970        | 1,659        | 9,510         | 314                    |
| Coleoptera        | Elateridae                        | <i>I. luminosus</i>         | 26325        | 1709        | 3,310        | 5,364      | 10069       | 5,873        | 11,232        | 1363                   |
| <b>Coleoptera</b> | <b>Lampyridae;<br/>Lampyrinae</b> | <b><i>P. pectoralis</i></b> | <b>13292</b> | <b>1709</b> | <b>3,016</b> | <b>268</b> | <b>7332</b> | <b>967</b>   | <b>9,543</b>  | <b>91</b>              |
| Coleoptera        | Lampyridae;<br>Lampyrinae         | <i>L. yunnanensis</i>       | 19433        | 1709        | 3,031        | 3,369      | 8058        | 3,266        | 9,729         | 431                    |
| Coleoptera        | Lampyridae;<br>Lampyrinae         | <i>P. pyralis</i>           | 20646        | 1709        | 3,996        | 1,799      | 11644       | 1,498        | 11,196        | 507                    |
| Coleoptera        | Lampyridae;<br>Luciolinae         | <i>A. terminalis</i>        | 20436        | 1709        | 3,077        | 1,866      | 8001        | 5,783        | 10,287        | 627                    |

**Table S12. GO and KEGG enrichment of the gene family expansion orthologous genes in *P.***

*pectoralis* Hi-C genome Ppec-2.0

| Class | ID         | Description                                                | p value  | Count |
|-------|------------|------------------------------------------------------------|----------|-------|
| KEGG  | map00980   | Metabolism of xenobiotics by cytochrome P450               | 6.79E-11 | 22    |
| KEGG  | map00981   | Insect hormone biosynthesis                                | 1.05E-10 | 15    |
| KEGG  | map00982   | Drug metabolism - cytochrome P450                          | 3.71E-08 | 18    |
| KEGG  | map00140   | Steroid hormone biosynthesis                               | 1.31E-07 | 15    |
| KEGG  | map00040   | Pentose and glucuronate interconversions                   | 4.02E-07 | 16    |
| KEGG  | map04217   | Necroptosis                                                | 1.44E-06 | 11    |
| KEGG  | map00053   | Ascorbate and aldarate metabolism                          | 3.97E-06 | 13    |
| KEGG  | map00983   | Drug metabolism - other enzymes                            | 6.62E-06 | 16    |
| KEGG  | map00860   | Porphyrin and chlorophyll metabolism                       | 7.53E-06 | 13    |
| KEGG  | map00830   | Retinol metabolism                                         | 9.60E-06 | 13    |
| KEGG  | map00760   | Nicotinate and nicotinamide metabolism                     | 5.73E-05 | 6     |
| KEGG  | map00790   | Folate biosynthesis                                        | 6.33E-05 | 7     |
| KEGG  | map00601   | Glycosphingolipid biosynthesis - lacto and neolacto series | 2.09E-04 | 4     |
| KEGG  | map00310   | Lysine degradation                                         | 5.96E-04 | 7     |
| KEGG  | map00510   | N-Glycan biosynthesis                                      | 6.31E-04 | 6     |
| KEGG  | map00590   | Arachidonic acid metabolism                                | 1.02E-03 | 6     |
| KEGG  | map00603   | Glycosphingolipid biosynthesis - globo and isoglobo series | 1.19E-03 | 4     |
| KEGG  | map04146   | Peroxisome                                                 | 2.78E-03 | 10    |
| KEGG  | map01110   | Biosynthesis of secondary metabolites                      | 3.63E-03 | 23    |
| KEGG  | map00280   | Valine, leucine and isoleucine degradation                 | 1.31E-02 | 5     |
| BP    | GO:0015074 | DNA integration                                            | 7.46E-30 | 45    |
| BP    | GO:0006310 | DNA recombination                                          | 1.28E-27 | 45    |
| BP    | GO:0006260 | DNA replication                                            | 1.64E-06 | 25    |
| BP    | GO:0006334 | nucleosome assembly                                        | 1.93E-06 | 9     |
| BP    | GO:0006352 | DNA-templated transcription, initiation                    | 1.07E-05 | 9     |
| BP    | GO:0050482 | arachidonic acid secretion                                 | 1.69E-03 | 5     |
| BP    | GO:0006644 | phospholipid metabolic process                             | 2.56E-03 | 5     |
| BP    | GO:0006139 | nucleobase-containing compound metabolic process           | 3.75E-03 | 7     |
| BP    | GO:0007608 | sensory perception of smell                                | 1.89E-02 | 6     |
| CC    | GO:0000786 | nucleosome                                                 | 9.50E-16 | 26    |
| MF    | GO:0016614 | oxidoreductase activity, acting on CH-OH group of donors   | 3.24E-27 | 38    |
| MF    | GO:0050660 | flavin adenine dinucleotide binding                        | 6.21E-26 | 49    |

|    |            |                                                                                                       |          |    |
|----|------------|-------------------------------------------------------------------------------------------------------|----------|----|
| MF | GO:0046982 | protein heterodimerization activity                                                                   | 1.29E-12 | 26 |
| MF | GO:0020037 | heme binding                                                                                          | 4.31E-10 | 50 |
| MF | GO:0016705 | oxidoreductase activity, acting on paired donors, with incorporation or reduction of molecular oxygen | 1.00E-09 | 45 |
| MF | GO:0004185 | serine-type carboxypeptidase activity                                                                 | 1.47E-09 | 13 |
| MF | GO:0003887 | DNA-directed DNA polymerase activity                                                                  | 1.79E-09 | 26 |
| MF | GO:0005506 | iron ion binding                                                                                      | 9.79E-09 | 45 |
| MF | GO:0000166 | nucleotide binding                                                                                    | 4.25E-05 | 26 |
| MF | GO:0004499 | N,N-dimethylaniline monooxygenase activity                                                            | 1.68E-04 | 6  |
| MF | GO:0004497 | monooxygenase activity                                                                                | 2.39E-04 | 11 |
| MF | GO:0003951 | NAD+ kinase activity                                                                                  | 2.91E-04 | 6  |
| MF | GO:0008146 | sulfotransferase activity                                                                             | 5.69E-04 | 9  |
| MF | GO:0032440 | 2-alkenal reductase [NAD(P)] activity                                                                 | 6.17E-04 | 5  |
| MF | GO:0047522 | 15-oxoprostaglandin 13-oxidase activity                                                               | 6.17E-04 | 5  |
| MF | GO:0004623 | phospholipase A2 activity                                                                             | 1.69E-03 | 5  |
| MF | GO:0050661 | NADP binding                                                                                          | 6.72E-03 | 6  |
| MF | GO:0004970 | ionotropic glutamate receptor activity                                                                | 9.89E-03 | 8  |
| MF | GO:0016627 | oxidoreductase activity, acting on the CH-CH group of donors                                          | 1.05E-02 | 7  |
| MF | GO:0004984 | olfactory receptor activity                                                                           | 1.89E-02 | 6  |
| MF | GO:0016758 | transferase activity, transferring hexosyl groups                                                     | 2.05E-02 | 13 |

---

**Table S13. GO and KEGG enrichment of the gene family contraction orthologous genes in *P.***

*pectoralis* Hi-C genome Ppec-2.0

| Class | ID         | Description                                                      | p value     | Count |
|-------|------------|------------------------------------------------------------------|-------------|-------|
| KEGG  | map02010   | ABC transporters                                                 | 1.83508E-52 | 37    |
| KEGG  | map04976   | Bile secretion                                                   | 9.75962E-40 | 32    |
| KEGG  | map04024   | cAMP signaling pathway                                           | 5.93217E-26 | 32    |
| KEGG  | map00061   | Fatty acid biosynthesis                                          | 8.05848E-15 | 12    |
| KEGG  | map04974   | Protein digestion and absorption                                 | 7.37942E-10 | 13    |
| KEGG  | map04080   | Neuroactive ligand-receptor interaction                          | 2.8807E-09  | 13    |
| KEGG  | map04972   | Pancreatic secretion                                             | 1.81702E-08 | 13    |
| KEGG  | map04910   | Insulin signaling pathway                                        | 1.29096E-07 | 12    |
| KEGG  | map01212   | Fatty acid metabolism                                            | 1.96607E-07 | 12    |
| KEGG  | map04152   | AMPK signaling pathway                                           | 3.34993E-07 | 12    |
| KEGG  | map04540   | Gap junction                                                     | 0.001621345 | 5     |
| KEGG  | map04145   | Phagosome                                                        | 0.002651855 | 6     |
| KEGG  | map04210   | Apoptosis                                                        | 0.009248321 | 5     |
| KEGG  | map04614   | Renin-angiotensin system                                         | 0.010960343 | 3     |
| KEGG  | map04530   | Tight junction                                                   | 0.019820412 | 5     |
| BP    | GO:0055085 | transmembrane transport                                          | 3.03462E-15 | 35    |
| BP    | GO:0006508 | proteolysis                                                      | 5.44062E-13 | 30    |
| BP    | GO:0007017 | microtubule-based process                                        | 1.22017E-05 | 5     |
| BP    | GO:0009058 | biosynthetic process                                             | 0.000205997 | 5     |
| BP    | GO:0006744 | ubiquinone biosynthetic process                                  | 0.212113616 | 1     |
| BP    | GO:0015991 | ATP hydrolysis coupled proton transport                          | 0.212113616 | 1     |
| BP    | GO:0005975 | carbohydrate metabolic process                                   | 0.581658551 | 2     |
| CC    | GO:0005874 | microtubule                                                      | 6.67218E-06 | 5     |
| MF    | GO:0042626 | ATPase activity, coupled to transmembrane movement of substances | 7.16304E-50 | 34    |
| MF    | GO:0016887 | ATPase activity                                                  | 6.50366E-46 | 39    |
| MF    | GO:0008237 | metallopeptidase activity                                        | 8.83042E-13 | 17    |
| MF    | GO:0004222 | metalloendopeptidase activity                                    | 8.13463E-12 | 14    |
| MF    | GO:0016740 | transferase activity                                             | 1.21564E-11 | 9     |
| MF    | GO:0004252 | serine-type endopeptidase activity                               | 5.76746E-08 | 16    |
| MF    | GO:0005549 | odorant binding                                                  | 2.19457E-06 | 12    |
| MF    | GO:0005200 | structural constituent of cytoskeleton                           | 3.32724E-06 | 5     |
| MF    | GO:0016491 | oxidoreductase activity                                          | 6.16375E-05 | 14    |
| MF    | GO:0016788 | hydrolase activity, acting on ester bonds                        | 6.27702E-05 | 5     |
| MF    | GO:0003824 | catalytic activity                                               | 0.006921458 | 14    |
| MF    | GO:0005507 | copper ion binding                                               | 0.025695831 | 2     |

|       |            |                                         |             |       |
|-------|------------|-----------------------------------------|-------------|-------|
| MF    | GO:0003924 | GTPase activity                         | 0.046084832 | 5     |
| Class | ID         | Description                             | pvalue      | Count |
| KEGG  | map02010   | ABC transporters                        | 1.83508E-52 | 37    |
| KEGG  | map04976   | Bile secretion                          | 9.75962E-40 | 32    |
| KEGG  | map04024   | cAMP signaling pathway                  | 5.93217E-26 | 32    |
| KEGG  | map00061   | Fatty acid biosynthesis                 | 8.05848E-15 | 12    |
| KEGG  | map04974   | Protein digestion and absorption        | 7.37942E-10 | 13    |
| KEGG  | map04080   | Neuroactive ligand-receptor interaction | 2.8807E-09  | 13    |
| KEGG  | map04972   | Pancreatic secretion                    | 1.81702E-08 | 13    |
| KEGG  | map04910   | Insulin signaling pathway               | 1.29096E-07 | 12    |
| KEGG  | map01212   | Fatty acid metabolism                   | 1.96607E-07 | 12    |
| KEGG  | map04152   | AMPK signaling pathway                  | 3.34993E-07 | 12    |
| KEGG  | map04540   | Gap junction                            | 0.001621345 | 5     |
| KEGG  | map04145   | Phagosome                               | 0.002651855 | 6     |
| KEGG  | map04210   | Apoptosis                               | 0.009248321 | 5     |
| KEGG  | map04614   | Renin-angiotensin system                | 0.010960343 | 3     |

---



**Table S14. GO and KEGG enrichment of the species-specific orthologous genes in *P. pectoralis***

**Hi-C genome Ppec-2.0**

| Class | ID         | Description                                                                                           | p value  | Count |
|-------|------------|-------------------------------------------------------------------------------------------------------|----------|-------|
| KEGG  | map00982   | Drug metabolism - cytochrome P450                                                                     | 9.74E-10 | 24    |
| KEGG  | map00980   | Metabolism of xenobiotics by cytochrome P450                                                          | 4.63E-09 | 24    |
| KEGG  | map00983   | Drug metabolism - other enzymes                                                                       | 3.02E-07 | 22    |
| KEGG  | map00900   | Terpenoid backbone biosynthesis                                                                       | 4.82E-07 | 12    |
| KEGG  | map00140   | Steroid hormone biosynthesis                                                                          | 7.48E-07 | 17    |
| KEGG  | map00981   | Insect hormone biosynthesis                                                                           | 1.29E-06 | 13    |
| KEGG  | map00830   | Retinol metabolism                                                                                    | 7.88E-06 | 16    |
| KEGG  | map01110   | Biosynthesis of secondary metabolites                                                                 | 1.10E-05 | 38    |
| KEGG  | map00053   | Ascorbate and aldarate metabolism                                                                     | 1.31E-05 | 15    |
| KEGG  | map00040   | Pentose and glucuronate interconversions                                                              | 1.55E-05 | 17    |
| KEGG  | map00860   | Porphyrin and chlorophyll metabolism                                                                  | 2.63E-05 | 15    |
| KEGG  | map04080   | Neuroactive ligand-receptor interaction                                                               | 1.22E-04 | 12    |
| KEGG  | map04974   | Protein digestion and absorption                                                                      | 2.02E-04 | 11    |
| KEGG  | map00480   | Glutathione metabolism                                                                                | 7.42E-04 | 11    |
| KEGG  | map04972   | Pancreatic secretion                                                                                  | 1.77E-03 | 11    |
| BP    | GO:0006508 | proteolysis                                                                                           | 5.87E-12 | 59    |
| BP    | GO:0008299 | isoprenoid biosynthetic process                                                                       | 2.47E-05 | 8     |
| BP    | GO:0006334 | nucleosome assembly                                                                                   | 3.24E-04 | 6     |
| BP    | GO:0015074 | DNA integration                                                                                       | 2.02E-03 | 12    |
| BP    | GO:0006310 | DNA recombination                                                                                     | 4.25E-03 | 12    |
| CC    | GO:0000786 | nucleosome                                                                                            | 3.70E-11 | 19    |
| MF    | GO:0004252 | serine-type endopeptidase activity                                                                    | 7.36E-12 | 38    |
| MF    | GO:0046982 | protein heterodimerization activity                                                                   | 1.07E-04 | 13    |
| MF    | GO:0016705 | oxidoreductase activity, acting on paired donors, with incorporation or reduction of molecular oxygen | 1.53E-04 | 27    |
| MF    | GO:0005549 | odorant binding                                                                                       | 3.60E-04 | 19    |
| MF    | GO:0005506 | iron ion binding                                                                                      | 4.73E-04 | 27    |
| MF    | GO:0020037 | heme binding                                                                                          | 1.44E-03 | 27    |
| MF    | GO:0008425 | 2-polyprenyl-6-methoxy-1,4-benzoquinone methyltransferase activity                                    | 2.04E-03 | 4     |
| MF    | GO:0032440 | 2-alkenal reductase [NAD(P)] activity                                                                 | 2.04E-03 | 4     |
| MF    | GO:0047522 | 15-oxoprostaglandin 13-oxidase activity                                                               | 2.04E-03 | 4     |
| MF    | GO:0004222 | metalloendopeptidase activity                                                                         | 3.22E-03 | 11    |
| MF    | GO:0016758 | transferase activity, transferring hexosyl groups                                                     | 5.15E-03 | 12    |
